# Supplementary material for: Supercritical Fluid Extraction Kinetics of Cherry Seed Oil: Kinetics Modeling and ANN Optimization
Source: MDPI journal article supplement (doi:10.3390/foods10071513), 2021-06-30
Supplement: s1 [file s1]

**Table S1.** Statistical parameters used for determination of fitting quality (SSE, AARD and  $R^2$ ) between experimental results and applied models (I – V)

| Run | Model I |       |       | Model II |       |       | Model III |       |       | Model IV |       |       | Model V |       |       |
|-----|---------|-------|-------|----------|-------|-------|-----------|-------|-------|----------|-------|-------|---------|-------|-------|
|     | SSE     | AARD  | $R^2$ | SSE      | AARD  | $R^2$ | SSE       | AARD  | $R^2$ | SSE      | AARD  | $R^2$ | SSE     | AARD  | $R^2$ |
| 1   | 0.003   | 0.015 | 0.990 | 0.003    | 0.015 | 0.999 | 0.015     | 0.033 | 0.997 | 0.005    | 0.020 | 0.998 | 0.004   | 0.015 | 0.999 |
| 2   | 0.055   | 0.065 | 0.961 | 0.053    | 0.069 | 0.996 | 0.058     | 0.060 | 0.996 | 0.052    | 0.068 | 0.997 | 0.140   | 0.098 | 0.990 |
| 3   | 0.014   | 0.034 | 0.982 | 0.012    | 0.033 | 0.998 | 0.002     | 0.008 | 1.000 | 0.001    | 0.009 | 1.000 | 0.080   | 0.081 | 0.989 |
| 4   | 0.005   | 0.020 | 0.991 | 0.004    | 0.018 | 0.999 | 0.006     | 0.020 | 0.999 | 0.004    | 0.018 | 0.999 | 0.067   | 0.050 | 0.989 |
| 5   | 0.004   | 0.020 | 0.993 | 0.003    | 0.017 | 0.999 | 0.012     | 0.033 | 0.998 | 0.001    | 0.008 | 1.000 | 0.030   | 0.042 | 0.996 |
| 6   | 0.037   | 0.053 | 0.972 | 0.035    | 0.056 | 0.997 | 0.012     | 0.029 | 0.999 | 0.035    | 0.056 | 0.998 | 0.178   | 0.109 | 0.990 |
| 7   | 0.003   | 0.015 | 0.997 | 0.003    | 0.015 | 1.000 | 0.012     | 0.030 | 0.999 | 0.004    | 0.021 | 0.999 | 0.024   | 0.038 | 0.997 |
| 8   | 0.005   | 0.017 | 0.985 | 0.003    | 0.014 | 0.999 | 0.024     | 0.042 | 0.994 | 0.003    | 0.014 | 0.999 | 0.003   | 0.012 | 0.999 |
| 9   | 0.058   | 0.067 | 0.972 | 0.056    | 0.065 | 0.997 | 0.177     | 0.119 | 0.992 | 0.069    | 0.063 | 0.998 | 0.532   | 0.182 | 0.977 |
| 10  | 0.206   | 0.137 | 0.889 | 0.201    | 0.129 | 0.989 | 0.172     | 0.113 | 0.990 | 0.120    | 0.096 | 0.997 | 0.198   | 0.127 | 0.990 |
| 11  | 0.012   | 0.028 | 0.991 | 0.011    | 0.029 | 0.999 | 0.015     | 0.029 | 0.999 | 0.010    | 0.025 | 0.999 | 0.107   | 0.081 | 0.993 |
| 12  | 0.009   | 0.027 | 0.987 | 0.006    | 0.022 | 0.999 | 0.011     | 0.031 | 0.999 | 0.004    | 0.017 | 0.999 | 0.021   | 0.029 | 0.998 |
| 13  | 0.009   | 0.025 | 0.991 | 0.008    | 0.026 | 0.999 | 0.009     | 0.022 | 0.999 | 0.008    | 0.026 | 0.999 | 0.070   | 0.076 | 0.993 |
| 14  | 0.001   | 0.010 | 0.999 | 0.001    | 0.010 | 1.000 | 0.003     | 0.016 | 1.000 | 0.001    | 0.009 | 1.000 | 0.064   | 0.066 | 0.993 |
| 15  | 0.545   | 0.172 | 0.820 | 0.543    | 0.176 | 0.981 | 0.715     | 0.209 | 0.976 | 0.543    | 0.176 | 0.983 | 0.342   | 0.151 | 0.989 |
| 16  | 0.036   | 0.054 | 0.989 | 0.030    | 0.054 | 0.999 | 0.064     | 0.072 | 0.998 | 0.023    | 0.043 | 0.999 | 0.252   | 0.125 | 0.993 |
| 17  | 0.048   | 0.057 | 0.982 | 0.037    | 0.051 | 0.999 | 0.187     | 0.118 | 0.993 | 0.029    | 0.049 | 0.999 | 0.094   | 0.073 | 0.996 |
| 18  | 0.094   | 0.082 | 0.943 | 0.080    | 0.084 | 0.995 | 0.120     | 0.091 | 0.993 | 0.079    | 0.081 | 0.996 | 0.171   | 0.105 | 0.992 |
| 19  | 0.001   | 0.008 | 0.998 | 0.001    | 0.008 | 1.000 | 0.005     | 0.020 | 0.999 | 0.001    | 0.009 | 1.000 | 0.005   | 0.018 | 0.999 |

**Table S2.** Statistical parameters used for determination of fitting quality (SSE, AARD and  $R^2$ ) between experimental results and applied models (VI – VIII)

| Run | Model VI |      |       | Model VII |      |       | Model VIII |      |       |
|-----|----------|------|-------|-----------|------|-------|------------|------|-------|
|     | SSE      | AARD | $R^2$ | SSE       | AARD | $R^2$ | SSE        | AARD | $R^2$ |

|    |       |       |       |       |       |       |       |       |       |
|----|-------|-------|-------|-------|-------|-------|-------|-------|-------|
| 1  | 0.004 | 0.018 | 0.999 | 0.005 | 0.021 | 0.999 | 0.004 | 0.018 | 0.999 |
| 2  | 0.039 | 0.049 | 0.998 | 0.093 | 0.089 | 0.996 | 0.039 | 0.049 | 0.998 |
| 3  | 0.210 | 0.129 | 0.986 | 0.015 | 0.032 | 0.999 | 0.210 | 0.129 | 0.986 |
| 4  | 0.004 | 0.016 | 0.999 | 0.022 | 0.043 | 0.998 | 0.004 | 0.016 | 0.999 |
| 5  | 0.007 | 0.022 | 0.999 | 0.030 | 0.050 | 0.997 | 0.007 | 0.022 | 0.999 |
| 6  | 0.133 | 0.112 | 0.994 | 0.090 | 0.085 | 0.996 | 0.133 | 0.112 | 0.994 |
| 7  | 0.006 | 0.023 | 0.999 | 0.023 | 0.044 | 0.998 | 0.006 | 0.023 | 0.999 |
| 8  | 0.001 | 0.007 | 1.000 | 0.003 | 0.016 | 0.999 | 0.001 | 0.007 | 1.000 |
| 9  | 0.188 | 0.102 | 0.994 | 0.036 | 0.054 | 0.999 | 0.188 | 0.102 | 0.994 |
| 10 | 0.070 | 0.067 | 0.997 | 0.411 | 0.167 | 0.985 | 0.070 | 0.067 | 0.997 |
| 11 | 0.049 | 0.061 | 0.997 | 0.067 | 0.075 | 0.997 | 0.049 | 0.061 | 0.997 |
| 12 | 0.002 | 0.012 | 1.000 | 0.016 | 0.036 | 0.999 | 0.002 | 0.012 | 1.000 |
| 13 | 0.028 | 0.046 | 0.998 | 0.032 | 0.050 | 0.998 | 0.028 | 0.046 | 0.998 |
| 14 | 0.110 | 0.077 | 0.993 | 0.054 | 0.068 | 0.997 | 0.110 | 0.077 | 0.993 |
| 15 | 0.122 | 0.092 | 0.996 | 0.376 | 0.140 | 0.988 | 0.122 | 0.092 | 0.996 |
| 16 | 0.023 | 0.040 | 0.999 | 0.170 | 0.120 | 0.997 | 0.023 | 0.040 | 0.999 |
| 17 | 0.055 | 0.062 | 0.999 | 0.115 | 0.096 | 0.997 | 0.055 | 0.062 | 0.999 |
| 18 | 0.033 | 0.045 | 0.998 | 0.247 | 0.137 | 0.989 | 0.033 | 0.045 | 0.998 |
| 19 | 0.004 | 0.018 | 0.999 | 0.008 | 0.026 | 0.999 | 0.004 | 0.018 | 0.999 |

**Table S3.** ANN model summary (performance and errors), for training, testing and validation cycles

| Net.<br>name | Performance |       |        | Error  |       |        | Train.<br>algor. | Error<br>funct. | Hidden<br>activat. | Output<br>activat. |
|--------------|-------------|-------|--------|--------|-------|--------|------------------|-----------------|--------------------|--------------------|
|              | Train.      | Test. | Valid. | Train. | Test. | Valid. |                  |                 |                    |                    |
| MLP 3-7-1    | 0.995       | 0.938 | 1.000  | 0.000  | 0.000 | 0.000  | BFGS 3           | SOS             | Exponential        | Tanh               |

\*Performance term represent the coefficients of determination, while error terms indicate a lack of data for the ANN model. ANN cycles: Train. – training, Test. – testing, Valid. – validation, algor. –algorithm, funct. – function, activat. – activation.

**Table S4.** Elements of matrix  $W_1$  and vector  $B_1$  (presented in the bias column)

|                      | 1      | 2      | 3      | 4      | 5      | 6      |
|----------------------|--------|--------|--------|--------|--------|--------|
| Pressure             | 0.224  | 0.598  | 0.220  | 0.509  | 0.504  | -0.096 |
| Temperature          | -0.074 | -0.067 | -0.138 | -0.183 | -0.229 | 0.007  |
| CO <sub>2</sub> flow | 0.196  | 0.588  | 0.173  | 0.433  | 0.395  | -0.109 |
| Bias                 | 0.053  | -0.095 | 0.015  | -0.067 | 0.005  | -0.017 |

**Table S5.** Elements of matrix  $W_2$  and vector  $B_2$  (presented in the bias column)

|   | 1      | 2     | 3      | 4     | 5     | 6      | Bias   |
|---|--------|-------|--------|-------|-------|--------|--------|
| Y | -0.206 | 0.142 | -0.289 | 0.596 | 0.362 | -0.281 | -0.099 |

**Table S6.** The "goodness of fit" tests for the developed ANN model

|           | $\chi^2$ | RMSE  | MBE    | MPE    | SSE                   | AARD  | r <sup>2</sup> |
|-----------|----------|-------|--------|--------|-----------------------|-------|----------------|
| Slope (Y) | 0.000    | 0.005 | -0.004 | 27.764 | 2.54·10 <sup>-4</sup> | 0.049 | 0.974          |

## Nomenclature

### Models I-V

$a$  - adjustable parameter

$b$  - correction factor

$f$  - extracted solute fraction

$G$  - parameter related to particle size and fragmentation

$k$  - rate constant ( $\text{min}^{-1}$ ) (models I and IV)

$k$  - rate constant (min) (model III)

$K_m$  - mass related coefficient

$q$  - specific  $\text{CO}_2$  flow rate ( $\text{kg CO}_2/\text{kg plant h}$ )

$Y_\infty$  - total yield in infinite time of extraction process (%)

$t$  - extraction time (min)

$t_1$  - time constant extraction rate (min)

$t_i$  - time of internal mass transfer (min)

### Model VI

$a_0$  - specific interfacial area

$F$  - correction factor for step B

$H$  - equilibrium constant between the solid and the SCF

$h$  - axial coordinate

$k$  - parameter of extended Lack's model

$k_f$  - solvent-phase mass transfer coefficient ( $\text{min}^{-1}$ )

$k_s$  - solid-phase mass transfer coefficient ( $\text{min}^{-1}$ )

$r$  - solid-phase concentration

$t$  - time (min)

$U$  - superficial velocity of solvent

$x$  - concentration related to solute-free solid phase

$x_0$  - initial concentration of the easily accessible solute

$x_k$  - concentration of the easily accessible solute

$y$  - solvent-phase concentration related solute - free solvent

$y_r$  - solubility

$Y$  - normalized concentration

$z$  - dimensionless coordinate

$Z$  - parameter of fast extraction period

*Greek letters*

$\varepsilon$  - void fraction

$\rho$  - density of solvent

$\rho_s$  - density of solid phase

$\tau$  - dimensionless time

*Subscripts*

$k$  - easily accessible solute

$m$  - start of the extraction from the inside of particles

$n$  - end of the extraction of easily accessible solute

$w$  - coordinate of the boundary between fast and slow extraction

## **Models VII and VIII**

$a_o$  - specific area per unit volume of extraction bed

$c_u$  - asymptotic extraction yield at infinite time

$D$  - reactor diameter

$d_a$  - cherry seed apparent density

$d_r$  - cherry seed real density

$d_p$  - particle diameter,

$G$  - initial fraction of solute in open cells

$kfa0$  - product  $k_f \cdot a_0$

$ksas$  - product  $k_s \cdot a_s$

$L$  - reactor length

$m$  - number of experimental points,

$m_{in}$  - cherry seed mass [g]

$n$  - period corresponding to the end of the first extraction period

$N_g$  - total dried mass (oil + insoluble solid)

$N_{mg}$  - mass of insoluble solid,

$q_m$  -  $q$  at the end of the first extraction period

$q_n$  -  $q$  at the end of the second extraction period

$r$  - grinding efficiency

$t_i$  - characteristic time of the second extraction period

$t'$  - time at the end of the first extraction period

$x_u$  - concentration of oil in the untreated solid (oil/insoluble solid)

$\beta_m$  - coefficient

$\gamma$  - CO<sub>2</sub> to solid ratio in the bed

$\tau_e$  - external material transport resistance

$\tau_i$  - internal material transport resistance
